# Supplementary material
Source: PubMed Central journal article supplement (PMC1785143)
Supplement: blood_blood-2006-05-023663_1.pdf [file blood_blood-2006-05-023663_1.pdf]

| Peptide source          | Sequence               | HLA restriction | Pool / subpool |
|-------------------------|------------------------|-----------------|----------------|
| EBNA1 (400-414)         | PGRRPFHPVGEADY         | n.d.            | M / I          |
| EBNA1 (405-418)         | FFHPVGEADYFEYH         | n.d.            | M / I          |
| EBNA1 (409-422)         | VGEADYFEYHQEGG         | n.d.            | M / I          |
| EBNA1 (413-429)         | DYFEYHQEGGPDGEPDV      | n.d.            | M / I          |
| EBNA1 (420-434)         | EGGPDGEPDVPPGAI        | n.d.            | M / I          |
| EBNA1 (425-439)         | GEPDVPPGAIEQGPA        | n.d.            | M / I          |
| EBNA1 (430-451)         | PPGAIEQGPADDPGEGPSTGPR | n.d.            | M / I          |
| EBNA1 (435-451)         | EQGPADDPGEGPSTGPR      | n.d.            | M / I          |
| EBNA1 (442-458)         | PGEGPSTGPRGGDGGRR      | n.d.            | M / I          |
| EBNA1 (449-461)         | GPRGQGDGRRKK           | n.d.            | M / I          |
| EBNA1 (452-465)         | GQGDGRRKKGGWF          | n.d.            | M / II         |
| EBNA1 (456-469)         | GGRRKKGGWFGKHR         | n.d.            | M / II         |
| EBNA1 (460-474)         | KKGGWFGKHRGQGGSS       | n.d.            | M / II         |
| EBNA1 (465-478)         | FGKHRGQGGSNPKF         | n.d.            | M / II         |
| EBNA1 (469-482)         | RQGGSNPKFENIA          | n.d.            | M / II         |
| EBNA1 (473-487)         | GSNPKFENIAEGLRA        | n.d.            | M / II         |
| EBNA1 (478-491)         | FENIAEGLRALLAR         | n.d.            | M / II         |
| EBNA1 (482-496)         | AEGLRALLARSHVER        | n.d.            | M / II         |
| EBNA1 (487-503)         | ALLARSHVERTTDEGTW      | n.d.            | M / II         |
| EBNA1 (494-508)         | VERTTDEGTWVAGVF        | n.d.            | M / II         |
| EBNA1 (499-510)         | DEGTWVAGVFVY           | n.d.            | M / III        |
| EBNA1 (501-514)         | GTWVAGVFVYGGSK         | n.d.            | M / III        |
| EBNA1 (505-518)         | AGVFVYGGSKTSLY         | n.d.            | M / III        |
| EBNA1 (509-522)         | VYGGSKTSLYNLRR         | n.d.            | M / III        |
| EBNA1 (513-527)         | SKTSLYNLRRGTALA        | n.d.            | M / III        |
| EBNA1 (519-532)         | NLRRGTALAIQQR          | n.d.            | M / III        |
| EBNA1 (523-539)         | GTALAIQQRILTPL         | n.d.            | M / III        |
| EBNA1 (527-541)         | AIQQRILTPLSRLPF        | n.d.            | M / III        |
| EBNA1 (532-544)         | RLTPLSRLPFGMA          | n.d.            | M / III        |
| EBNA1 (535-548)         | PLSRLPFGMAPGPG         | n.d.            | M / III        |
| EBNA1 (539-554)         | LPFGMAPGPGPQPGPL       | n.d.            | M / IV         |
| EBNA1 (545-559)         | PGPGPQGPLRESIV         | n.d.            | M / IV         |
| EBNA1 (549-563)         | PQGPLRESIVCYFM         | n.d.            | M / IV         |
| EBNA1 (554-569)         | LRESIVCYFMVFL          | n.d.            | M / IV         |
| EBNA1 (557-571)         | SIVCYFMVFLQTHIF        | n.d.            | M / IV         |
| EBNA1 (562-576)         | FMVFLQTHIFAEVLK        | n.d.            | M / IV         |
| EBNA1 (566-580)         | LQTHIFAEVLKDAIK        | n.d.            | M / IV         |
| EBNA1 (571-584)         | FAEVLKDAIKDLVM         | n.d.            | M / IV         |
| EBNA1 (575-588)         | LKDAIKDLVMTKPA         | n.d.            | M / IV         |
| EBNA1 (579-593)         | IKDLVMTKPAPTANI        | n.d.            | M / IV         |
| EBNA1 (584-599)         | MTKPAPTANIRVTV         | n.d.            | M / V          |
| EBNA1 (588-600)         | APTANIRVTVCSF          | n.d.            | M / V          |
| EBNA1 (591-604)         | CNIRVTVCSFDDGV         | n.d.            | M / V          |
| EBNA1 (595-609)         | VTVCSFDDGVLDLPPW       | n.d.            | M / V          |
| EBNA1 (600-614)         | FDDGVLDLPPWFPPMV       | n.d.            | M / V          |
| EBNA1 (605-619)         | DLPPWFPPMVEGAAA        | n.d.            | M / V          |
| EBNA1 (610-624)         | FPPMVEGAAEGDDG         | n.d.            | M / V          |
| EBNA1 (615-629)         | EGAAEGDDGDDGDE         | n.d.            | M / V          |
| EBNA1 (620-634)         | EGDDGDDGDEGGDGD        | n.d.            | M / V          |
| EBNA1 (625-639)         | DDGDEGGDGEDEEG         | n.d.            | M / V          |
| EBNA1 (630-641)         | GGDGEDEEGEQE           | n.d.            | M / V          |
| <b>EBV PEPTIDE MIX:</b> |                        |                 |                |
| EBNA3A (158-166)        | QAKWRLQTL              | HLA-B8          | EBV            |
| EBNA3A (325-333)        | FLRGRAYGL              | HLA-B8          | EBV            |
| EBNA3A (379-387)        | RPPIFIRRL              | HLA-B7          | EBV            |
| EBNA3A (458-466)        | YPLHEQHGM              | HLA-B35         | EBV            |
| EBNA3A (603-611)        | RLRAEAQVK              | HLA-A3          | EBV            |
| EBNA3B (416-424)        | IVTDFSVIK              | HLA-A11         | EBV            |
| EBNA3C (258-266)        | RRIYDLIEL              | HLA-B27         | EBV            |
| EBNA3C (281-290)        | EENLLDFVRF             | HLA-B44         | EBV            |
| BZLF1 (190-197)         | RAKFKQLL               | HLA-B8          | EBV            |
| BRLF1 (28-37)           | DYCNVLNKEF             | HLA-A24         | EBV            |
| BRLF1 (134-143)         | ATIGTAMYK              | HLA-A11         | EBV            |
| BRLF1 (148-156)         | RVRAYTYSK              | HLA-A3          | EBV            |
| BMLF1 (259-267)         | GLCTLVAML              | HLA-A2          | EBV            |
| <b>CMV PEPTIDE MIX:</b> |                        |                 |                |
| pp65 (417-426)          | TPRVTGGGAM             | HLA-B7          | CMV            |
| pp65 (495-503)          | NLVPMTATV              | HLA-A2          | CMV            |
| pp65 (512-521)          | EFFWDANDIY             | HLA-B44         | CMV            |
