# Supplementary material
Source: PubMed Central journal article supplement (PMC1785143)
Supplement: blood_blood-2006-05-023663_2.pdf [file blood_blood-2006-05-023663_2.pdf]

|              | Medium        | SEB           | CMV           | EBV           | EBNA1         | Pool I        | Pool II       | Pool III      | Pool IV       | Pool V        |
|--------------|---------------|---------------|---------------|---------------|---------------|---------------|---------------|---------------|---------------|---------------|
| <b>RU001</b> | 0.0010        | 4.2300        | 0.0064        | 0.0017        | <b>0.0190</b> | <b>0.0100</b> | <b>0.0110</b> | 0.0036        | 0.0028        | 0.0025        |
| <b>RU002</b> | 0.0014        | 2.2900        | 0.0054        | 0.0096        | <b>0.0084</b> | <b>0.0150</b> | <b>0.0072</b> | <b>0.0140</b> | 0.0041        | <b>0.0072</b> |
| <b>RU003</b> | 0.0029        | 1.0500        | 0.0074        | 0.0037        | <b>0.0380</b> | 0.0020        | 0.0068        | <b>0.0160</b> | 0.0056        | 0.0012        |
| <b>RU004</b> | 0.0097        | 0.7400        | 0.0087        | 0.0180        | 0.0110        | <b>0.0210</b> | 0.0046        | 0.0130        | 0.0120        | 0.0082        |
| <b>RU005</b> | 0.0029        | 1.6000        | 0.0013        | 0.0040        | <b>0.0290</b> | <b>0.0180</b> | 0.0090        | 0.0084        | <b>0.0150</b> | 0.0019        |
| <b>RU006</b> | 0.0043        | 2.1000        | 0.0150        | 0.0110        | 0.0052        | <b>0.0190</b> | <b>0.0210</b> | 0.0096        | 0.0050        | 0.0044        |
| <b>RU007</b> | 0.0007        | 0.6800        | 0.0021        | 0.0016        | <b>0.0190</b> | 0.0050        | <b>0.0180</b> | 0.0080        | 0.0055        | 0.0070        |
| <b>RU008</b> | 0.0019        | 0.9500        | 0.0036        | 0.0033        | <b>0.0080</b> | 0.0000        | <b>0.0097</b> | 0.0045        | <b>0.0096</b> | 0.0015        |
| <b>RU009</b> | 0.0014        | 1.0500        | 0.0063        | 0.0061        | <b>0.0055</b> | <b>0.0390</b> | 0.0000        | <b>0.0380</b> | 0.0130        | <b>0.0360</b> |
| <b>RU010</b> | 0.0063        | 0.1700        | 0.0100        | 0.0087        | <b>0.0530</b> | 0.0160        | <b>0.0240</b> | <b>0.0330</b> | 0.0160        | <b>0.0420</b> |
| <b>RU011</b> | 0.0041        | n.d.          | 0.0058        | 0.0015        | <b>0.0200</b> | 0.0027        | 0.0100        | 0.0013        | 0.0030        | <b>0.0190</b> |
| <i>RU012</i> | <i>0.0150</i> | <i>1.5100</i> | <i>0.0380</i> | <i>0.0230</i> | <i>0.0120</i> | <i>0.0210</i> | <i>0.0082</i> | <i>0.0110</i> | <i>0.0150</i> | <i>0.0190</i> |
| <b>RU013</b> | 0.0078        | 2.6600        | 0.0042        | 0.0160        | <b>0.0220</b> | <b>0.0260</b> | <b>0.0330</b> | 0.0120        | 0.0054        | 0.0140        |
| <b>RU014</b> | 0.0013        | 2.0300        | 0.0041        | 0.0220        | <b>0.0400</b> | 0.0180        | 0.0140        | 0.0170        | 0.0074        | <b>0.0230</b> |
| <i>RU015</i> | <i>0.0029</i> | <i>0.2700</i> | <i>0.0014</i> | <i>0.0014</i> | <i>0.0017</i> | <b>0.0076</b> | <i>0.0011</i> | <i>0.0011</i> | <i>0.0019</i> | <i>0.0000</i> |
| <b>RU016</b> | 0.0080        | 1.3000        | 0.0060        | 0.0067        | 0.0140        | 0.0099        | 0.0020        | <b>0.0240</b> | 0.0060        | <b>0.0260</b> |
| <b>RU017</b> | 0.0023        | 2.8200        | 0.0072        | 0.2000        | <b>0.0450</b> | <b>0.0430</b> | 0.0047        | 0.0052        | 0.0110        | 0.0062        |
| <b>RU018</b> | 0.0160        | 0.9700        | 0.0130        | 0.0310        | <b>0.0390</b> | 0.0260        | 0.0230        | 0.0260        | 0.0150        | 0.0000        |
| <b>RU019</b> | 0.0097        | 9.0300        | 0.0120        | 0.0170        | <b>0.0200</b> | <b>0.0220</b> | 0.0120        | 0.0061        | 0.0160        | 0.0029        |
| <b>RU022</b> | 0.0041        | 2.8300        | 0.0036        | 0.0091        | <b>0.0160</b> | 0.0062        | 0.0066        | <b>0.0130</b> | <b>0.0095</b> | 0.0044        |
| <i>RU020</i> | <i>0.0020</i> | <i>2.0700</i> | <i>0.0000</i> | <i>0.0020</i> | <i>0.0031</i> | <i>0.0013</i> | <i>0.0034</i> | <i>0.0025</i> | <i>0.0048</i> | <i>0.0027</i> |

Medium= no stimulus, SEB= Staphylococcal enterotoxin B, CMV= MHC class I restricted peptides derived from HCMV antigens (Supplemental Table 1), EBV= MHC class I restricted peptides derived from EBV antigens (Supplemental Table 1), EBNA1= all 51 overlapping EBNA1 peptides, Pool I-IV= subsets of 10 overlapping peptides of EBNA1 (Supplemental Table 1), and Pool V= subset of 11 overlapping peptides of EBNA1 (Supplemental Table 1). Positive responses for EBNA1 are shown in bold. Non-responsive volunteers are shown in italics, and the EBV-negative volunteer is listed last (RU020).
