# Supplementary material
Source: PubMed Central journal article supplement (PMC1785143)
Supplement: blood_blood-2006-05-023663_3.pdf [file blood_blood-2006-05-023663_3.pdf]

|              | <b>Medium</b> | <b>EBNA1</b> |
|--------------|---------------|--------------|
| <b>RU001</b> | 0.0158        | 0.1024       |
| <b>RU002</b> | 0.0248        | 0.2718       |
| <b>RU003</b> | 0.0169        | 0.0379       |
| <b>RU004</b> | 0.0385        | 0.7561       |
| <b>RU005</b> | 0.1600        | 0.4714       |
| <b>RU006</b> | 0.0082        | 0.1001       |
| <b>RU007</b> | 0.0146        | 0.1935       |
| <b>RU008</b> | 0.0070        | 0.0854       |
| <b>RU014</b> | 0.1189        | 0.2572       |
| <b>RU018</b> | 0.2408        | 0.3098       |
