# Supplementary material
Source: PubMed Central journal article supplement (PMC1785143)

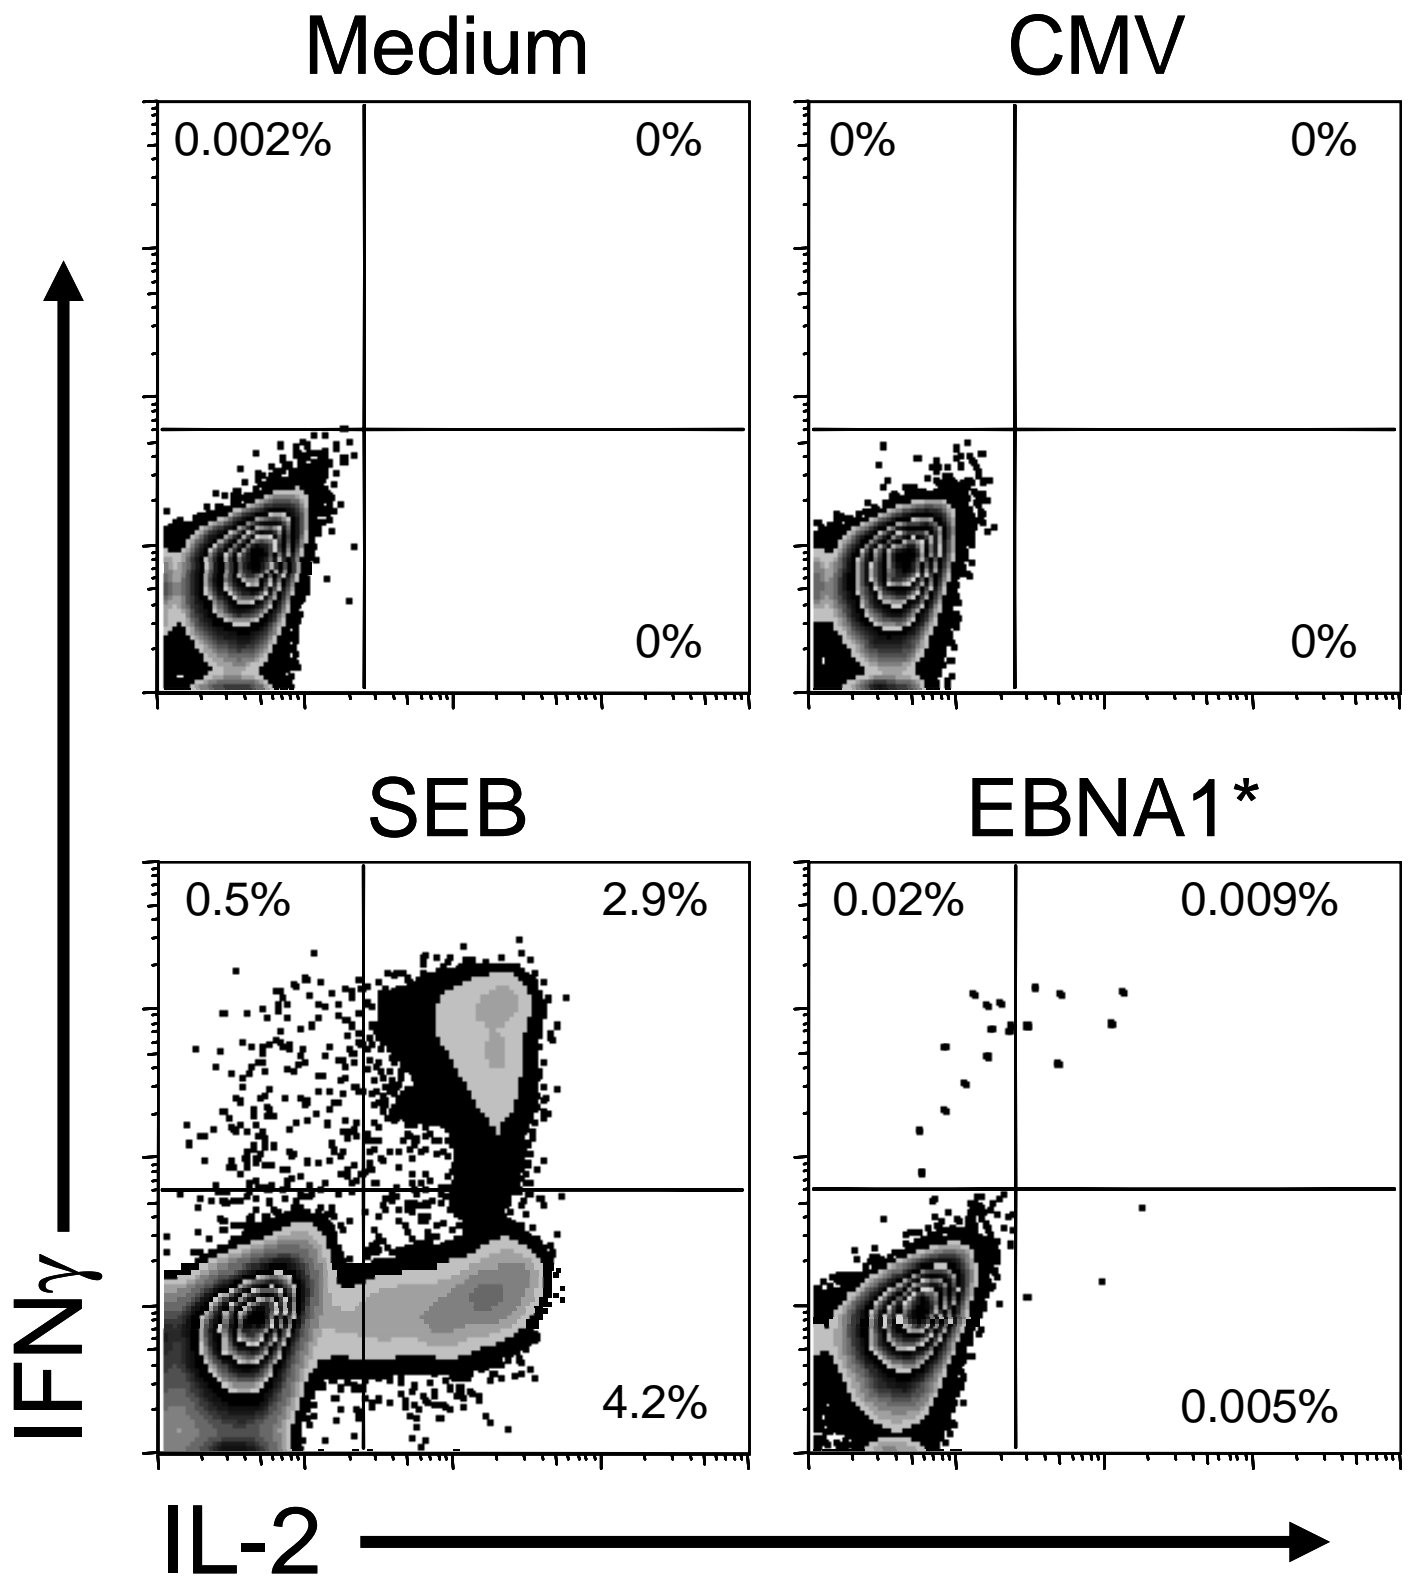

Supplement: blood_blood-2006-05-023663_4.pdf [file blood_blood-2006-05-023663_4.pdf]

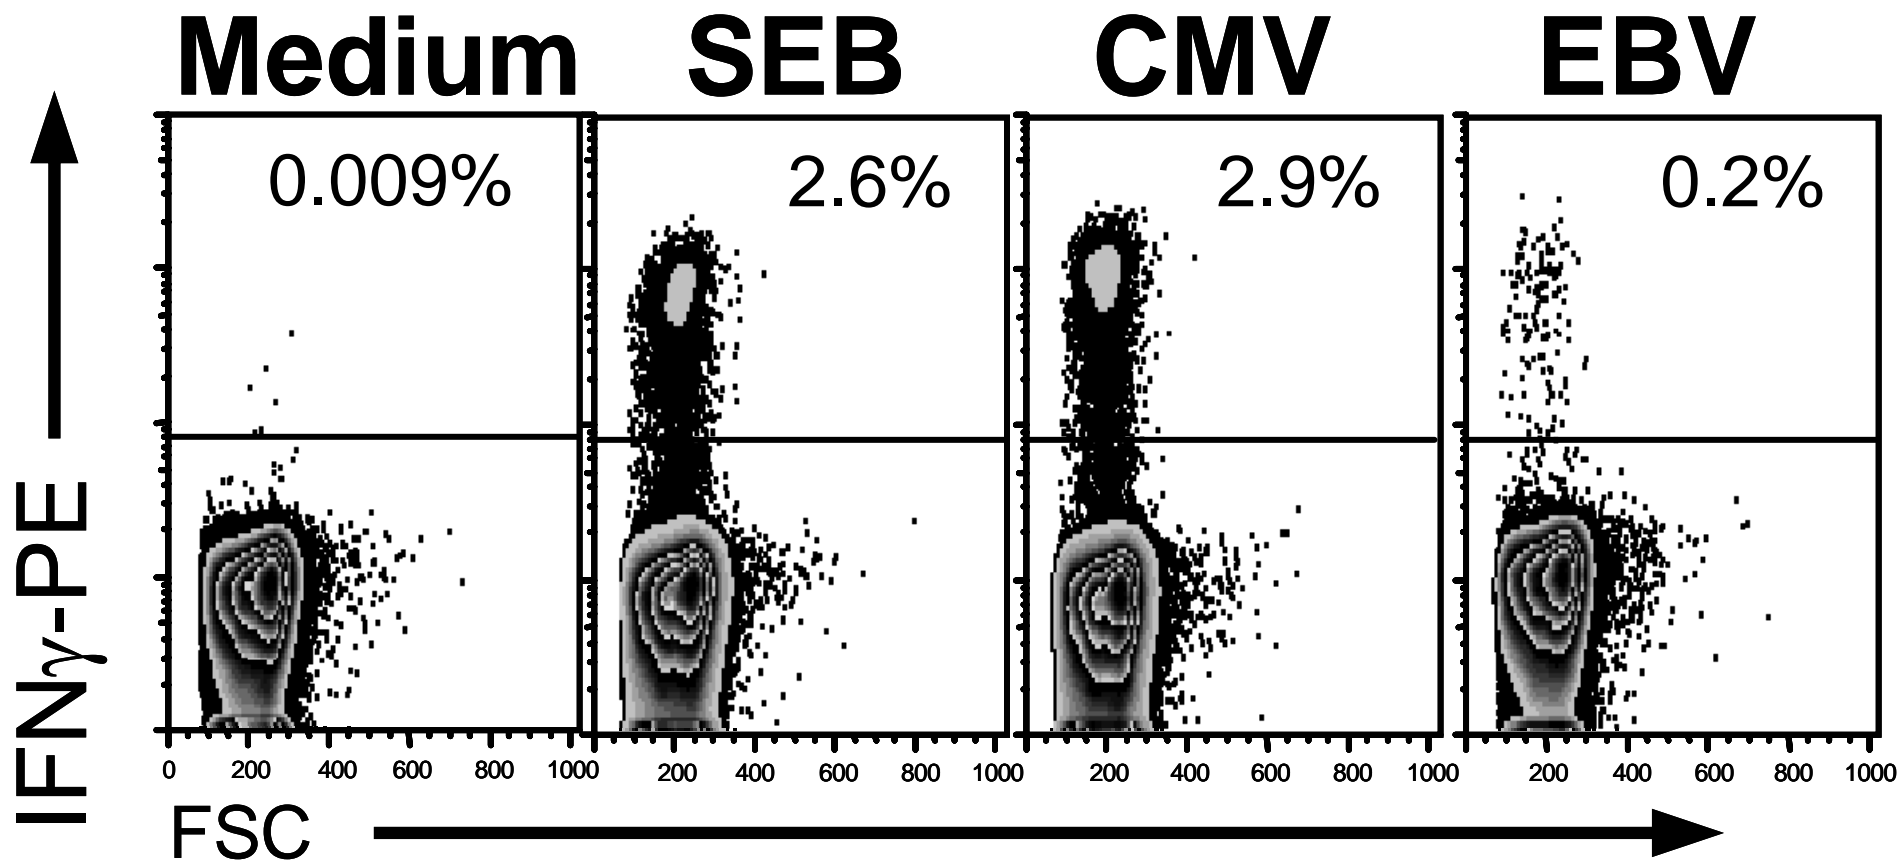

Supplement: blood_blood-2006-05-023663_5.pdf [file blood_blood-2006-05-023663_5.pdf]
